# Supplementary material
Source: Springer Nature journal article supplement (https://www.springermedizin.de/resource/supplementary/12882_2014_826_MOESM1_ESM.pdf/9454392)

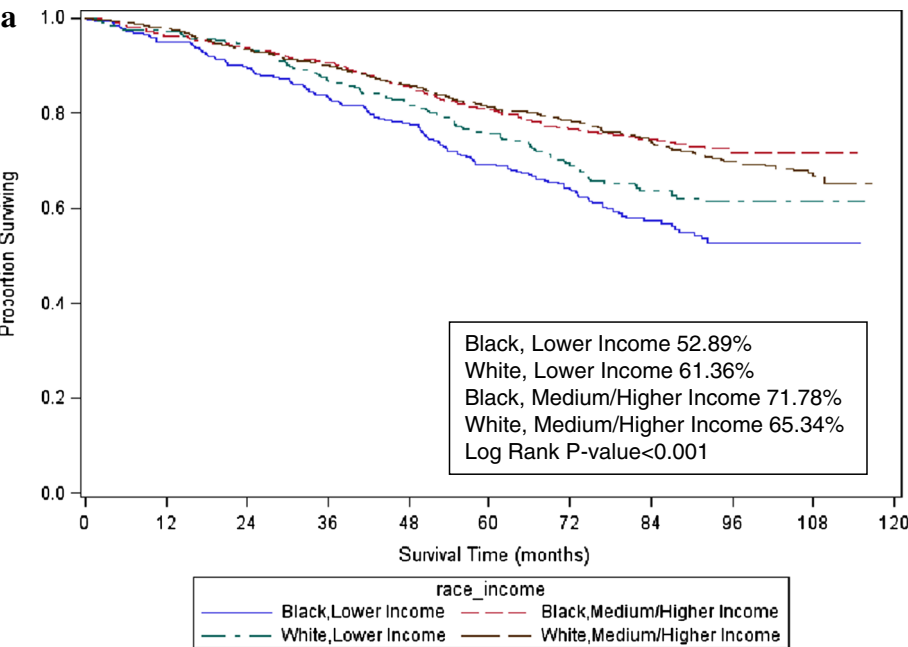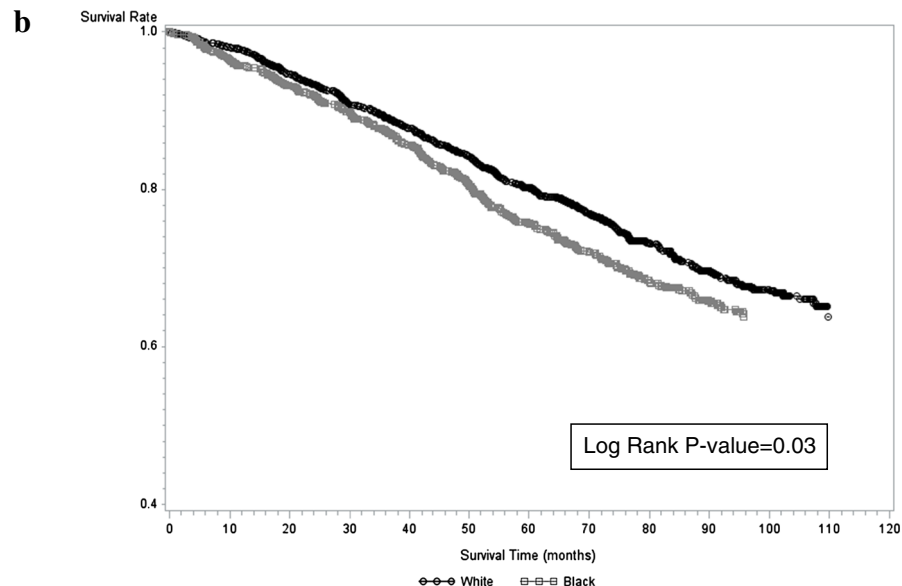

Supplement: MOESM1 [file 9454392]
